# Supplementary material
Source: publisher figshare collection journal article supplement (https://frontiersin.figshare.com/ndownloader/files/15112112)
Supplement: Supplementary file 1 [file 15112112]

## Sheet: Sheet1
Category	Features (presence/absence)	Codes			Caption: Codes used in the network of objects visualizations (early, middle and late)
Architecture	Shape of buildings	ArchIrr (irregular shape) ArchTH (typical house) ArchNorthSouth (north-south alignment)
	Location of highest platform	ArchHplat_NW (north-west corner of building) ArchHplat_NE (north-east corner of building) ArchHplat_CE (central-east part of building)
	Location of platform with the highest amount of burials	ArchBplat_NE (north-east platform) ArchBplat_CE (central-east platform)
	Location of benches	ArchBenchS (south) ArchBenchW (west) ArchBenchCE (central-east ) ArchBenchN (north) ArchBenchE (east north of the CE) ArchBenchT (tilted bench) ArchBenchL (long bench along the wall e.g. B.3 or B.55)
	Posts	ArchEPostSR (engaged post in side room) ArchMBPilasters (mudbrick pilasters)
	Location and typology of oven	ArchOvenSWc (oven location in the south-west corner) ArchOvenNE (oven location in the north-east) ArchOvenC (oven cut into wall) ArchOvenP (protruding oven) CdOven (closure deposit in oven e.g.B.58) CdOvenP (oven closure preserved and filled in) OvenSq (square protruding oven)
	Location and type of bins	ArchBinMR (bins in main room) ArchBinClean (clean plaster on bins)
	Separation between oven and hearth	ArchSepOH (separation of oven and hearth)
	Elaboration on the West wall	ArchWelab (posts on west wall or other form of western wall elaboration) ArchWdiv (screen isolating the western side of buildings)
	Burnt status	ArchBurnt_yes (burnt yes)
	South-west corner	SW (finds in south west corner)
Burials	Isolated heads in burials	BurialsIC
	Headless bodies	BurialsHLB
	Heads in tertiary contexts	BurialsCtc
	Foundation burials	Burials_F
	Presence of secondary burials	BurialsD2
	Type of burial	BurialsWp (wooden plank in burials) BurialsR (rodents in burials)
	Plastered skulls	BurialsSkullPlast
	Shells in burials	BurialsShR (shell with red ochre) BurialsHNass (high density of Nassarius in burial) BurialsHFDent (high density of fossil Dentalium in burial) BurialsHAnt (high density of Antalis in burial) BurialsHFW (high density of fresh water shells) BurialsHU (high density of Unio shells)
	Pigments in burials	BurialsCinn (cinnabar pigment in burials) BurialsRp (ocher on bones)
	Burials in ovens	BurialOv
Faunal remains	Birds	FaunaBirds (importantt birds remains) FaunaBirdsV (vulture remains) FaunaBirdsC (crane remains) FaunaBirdsB (bird bones in burials)
	Walf paw	FaunaWP
	Deer	FaunaDeer
	Bone tools	BoneFH (fish hook) BoneHarp (harpoon) BoneAntlerPen (antler pendant) BoneMet (sheep/goat metapodials in abandonment)
Botanical remains		BotPeas (peas) BotLentil (lentils) Bot2NB (2-raw naked barley) BotNT (new type cereal) BotEmmer (emmer) BotAcorns (acorns) BotAlmonds (almond) BotCruc (crucifex)
Obsidian	Hoards	ObsHoard (obsidian hoards) ObsHoardBif (bifaces in hoards) ObsHoardBifNNZD (NNZD bifaces in hoard) ObsBifD (bifacediamond shaped in hoards) ObsHoardBladesNNZD (NNZD blades in hoards)
	Projectiles	ObsPJwpp (projectiles in post pit)
	Blades	ObsOppB (opposed platform blade) ObsOppBCore (opposed platform blade core) ObsPressB (pressure-flaked blade) ObsPressBLev (pressure-flaked blade - lever technique) ObsPressBLong (pressure-flaked blade - long)
	Mirrors	ObsMirror
	Obsidian in burials	ObsB
	Obsidian evidence of manufacture	ObsPressbBladeM (evidence of obsidian blade manufacture) ObsProjM (evidence of obsidian projectile manufacture)
Chert	Dagger	ChFlintD (flint dagger)
	Technique	ChLever (pressure-Lever technique) (Foreign) ChPercussion (percussion technique) (Local) ChHandheld (pressure-handheld technique) (Local) ChIndirect (percussion-Indirect technique) (Foreign)
	Knives	ChKLever ( pressure lever technology) ChKIndirect (indirect percussion technology) ChKPress (pressure technology) ChKPressC (pressure crutch technology)
	Evidence of manufacture	ChM
	Amount of chert material and diversit	ChDiv
Personal adornments	Beads types and location	BeadsBF (butterfly beads) BeadsRedD (deer imitation) PaPendantB (pendant deposited in eastern platform in plaster)
	Beads manufacture	BeadsM (manufacture) BeadsShMP (production of marine shell beads – shell beads waste and raw material )
	Collar	PaCollarBoarT (decorated tusks collar)
Bricks	Types	BrickAg (grey alluvium) BrickCb (brown colluvium source) BrickSCL (sandy clay loam) BrickMcl (clean mortar) BrickBm (brown makeup) BrickInd (individually manufactured) BrıckSk (skinny bricks)
Wood	Type	WoodMaple (maple) WoodTimberH (evidence of horizontal timbers)
Paintings	Location	PaintLocN (paint location - north) PaintLocNE (paint location - north-east) PaintLocNW (paint location - north-west) PaintLocCW (paint location - central-west) PaintLocCE (paint location - central-east) PaintLocCN (paint location - central_north) PaintLocS (paint location - south) PaintLocSE (paint location - south-east) PaintLocSW (paint location - south-west) PaintLocE (paint location - east) P…
	Types	PaintTypNet (paint type geometric net) PaintTypBrick (paint type geometric brick) PaintTypZigzag (paint type geometric zigzag) PaintTypCh (paint type checker board) PaintTypRh (paint type rhombs) PaintTypH (paint type handprints) PaintTypTri (Triangles) PaintTypBull (paint type bull) PaintTypRLeo (paint type relief leopard) PaintTypVul (paint type vulture) PaintTypAnthro (paint type anthropomorph…
Installations/Wall features	Location	WF_NE (location of wall feature- north-east) WF_W (location of wall feature - west) WF_E (location of wall feature - east) WF_N (location of wall feature - north)
	Types	InstHCPl (Installations type in platforms) InstHCB (horncore in bench) InstHCPo (horncores on posts) InstLocNE (Installation location NE) WF_Groove (decorative groove on wall) WF_Bu (bucranium on wall) WF_Sniche (small niche painted red)
Groundstone	Types	GSMaceH (mace heads) GSDecQ (decorated querns) GSQ (quern) GSPal (palettes) GSHearth (single piece of ground stone left on hearth) SPebbCa (cache/cluster of pebbles)
Pottery	Location	PotPL (pottery placement) PotPLSE (location - south-east)
Figurines	Location	FigAD (anthropomorphic figurine in cluster of objects -SE buildings)
Closure practices	Types	CdBSpread (spread of botanical remains) CdOven (closure deposit in oven/closure e.g. puppy in B.58 or on top of oven like B.80) CdOvenP (oven closure (and bin) preserved and filled in) CdBinP (bin filled in with material at closure) GSHearth (ground stone on hearth closure) CdDI (placed dismantled installations) CdPS (placed scapulae) CdFR (dumped feasting remains) CdRP (removed posts) CdGs (plac…
